# Supplementary material
Source: publisher figshare collection journal article supplement (https://diabetesjournals.figshare.com/articles/dataset/_/12583115)
Supplement: Supplementary file 2 [file 1]

## SUPPLEMENTAL DATA

### Supplementary Figure S1. DW14006 was a direct AMPK $\alpha$ activator.

(A) Direct AMPK activators were designed by retaining the key pharmacophores of A-769662 and compound 991 based on the principle of scaffold hopping and bioisosteric replacement. (B) DW14006 exhibited a good activity in activating AMPK $\alpha$ .

### Supplementary Figure S2. Effects of DW14006 on body weight, blood glucose and lipid metabolism.

(A-F) No significant difference was found in blood glucose between diabetic mice and DW14006-treated diabetic mice. However, DW14006 treatment (15, 30 mg/kg) reduced body weight of *db/db* mice but had no impacts on STZ mice. (G and H) triglyceride (TG) and total cholesterol (TC) were measured in serum. DW14006 treatment reduced TC value in *db/db* mice and rendered no influence in STZ mice. Values were presented as mean  $\pm$  SEM, n = 12. \*P<0.05; \*\*P<0.01; \*\*\*P<0.001, STZ or *db/db* mice vs non-diabetic mice (Control, C57BL/6 or *db/m*) by Student's t-test. #P<0.05; ##P<0.01; ###P<0.001, DW14006-treated STZ or *db/db* mice vs diabetic mice (STZ induced or *db/db* mice) by one-way ANOVA with Dunnett's post-hoc test.

### Supplementary Figure S3. DW14006 promoted neurite outgrowth in sensory neurons from normal mice by activating AMPK $\alpha$ .

(A)  $\beta$ -tubulin III-immunostained sensory neurons from normal mice (C57BL/6 mice) were untreated (DMSO) or treated with DW14006 (2, 5, 10  $\mu$ M) for 24 h. Scale bar = 100  $\mu$ m. (B) Quantitative analyses of total neurite outgrowth for (A). (C)  $\beta$ -tubulin III-immunostained sensory neurons from normal mice were untreated (DMSO) or treated

with DW14006 (10  $\mu$ M) and AMPK specific inhibitor compound C (CC, 3  $\mu$ M). Scale bar = 50  $\mu$ m. **(D)** Quantitative analyses for **(C)**. All data were presented as mean  $\pm$  SEM of n = 7 replicate cultures. \* P < 0.05; \*\*P < 0.01; \*\*\*P < 0.001 vs. Control by one-way ANOVA with Dunnett's post-hoc test. # P < 0.05; ## P < 0.01; ### P < 0.001 vs. DW14006 (10  $\mu$ M) by Student's t-test.  $\beta$ -tubulin III is a specific antibody against neuron.

**Supplementary Figure S4. DW14006 upregulated expressions of NDUFS3 and COX IV by activating AMPK $\alpha$  in diabetic mice.**

**(A, B)** Quantitative immunoblot analyses revealed that expressions of mitochondrial respiratory chain proteins (NDUFS 3 and COX IV) were reduced in STZ and *db/db* mice and upregulated in DW14006 (15, 30 mg/kg)-treated diabetic DPN mice (STZ+15, 30 mg/kg, *db/db*+15, 30 mg/kg) versus age-matched Control (C57BL/6 mice) or *db/m* mice. **(C, D)** Quantification of NDUFS3 and COX IV expressions normalized to total extracellular regulated protein kinase (T-ERK) level. T-ERK remained unchanged. Values were presented as mean  $\pm$  SD of n = 3. \*P < 0.05; \*\*P < 0.01; \*\*\*P < 0.001, STZ or *db/db* mice vs. Control or *db/m* mice by Student's t-test. # P < 0.05; ## P < 0.01; ### P < 0.001, DW14006-treated STZ or *db/db* mice vs. STZ or *db/db* mice by one-way ANOVA with Dunnett's post-hoc test. **(E, F)** DW14006 treatment gave no effects on the expressions of NDUFS3 and COX IV in AAV8-AMPK $\alpha$ -RNAi injected STZ mice (STZ+AAV8-AMPK $\alpha$ -RNAi). Values were presented as mean  $\pm$  SD of n = 3. **(G)** AMPK $\alpha$  expression in DRG tissue from diabetic mice was obviously decreased after injecting AAV8-AMPK $\alpha$ -RNAi into STZ mice 2 weeks later compared with AAV8-NC injected STZ mice (STZ+AAV8-NC). **(H)** Quantification of total AMPK $\alpha$ , normalized to total extracellular regulated protein kinase (T-ERK) level. T-ERK remained unchanged. Values were presented as mean  $\pm$  SD of n = 3. \*P < 0.05; \*\*P <

0.01; \*\*\* $P < 0.001$ , STZ+AAV8-AMPK $\alpha$ -RNAi vs. STZ+AAV8-NC by Student's t-test.

NDUFS3 = NADH dehydrogenase (ubiquinone) iron-sulphur protein 3; COX IV = cytochrome c oxidase subunit IV.

**Supplementary Figure S5. DW14006 treatment reduced oxidative stress level in diabetic mice by activating AMPK $\alpha$ .**

(A-C) Representative immuno-fluorescent images showing the neuron-specific  $\beta$ -tubulin isotype III (neuron, green), 8-OHdG (oxidative stress, red) and Dapi (nucleus, blue) staining. (D, E) Quantification of 8-OHdG fluorescence intensity for (A-C). Bar = 50  $\mu$ M. (F, G) DW14006 treatment (15 or 30 mg/kg) increased SOD activity and GSH level, and decreased MDA level in serum from type 1 (STZ) and 2 (*db/db*) diabetic DPN mice. (H) DW14006 treatment (30 mg/kg) fail to change SOD activity, GSH or MDA levels in STZ+AAV8-AMPK $\alpha$ -RNAi mice. Values were presented as mean  $\pm$  SEM of  $n = 8$ /group. \* $P < 0.05$ ; \*\* $P < 0.01$ ; \*\*\* $P < 0.001$ , STZ or *db/db* mice vs. Control or *db/m* mice by Student's t-test. #  $P < 0.05$ ; ##  $P < 0.01$ ; ###  $P < 0.001$ , DW14006-treated STZ or *db/db* mice vs. STZ or *db/db* by one-way ANOVA with Dunnett's post-hoc test. 8-OHdG (8-hydroxy-2deoxyguanosine) was a biomarker of mitochondrial DNA (mtDNA) oxidative damage; SOD = superoxidase dismutase; GSH = glutathione; MDA = malondialdehyde.

**Supplementary Figure S6. DW14006 treatment gave no impacts on neurovascular function in AMPK $\alpha$  knockdown diabetic mice.**

(A) DW14006 (30 mg/kg) treatment had no effects on neurovascular function in AAV8-AMPK $\alpha$ -RNAi injected STZ mice. (B) Quantitative analysis for (A). All data were

normalized by the blood flow and perfusion areas in sciatic nerve and foot pad tissues from STZ+AAV8-NC mice presented as mean  $\pm$  SEM of n = 8. Lowest blood flow ratio was indicated in blue, maximum blood flow was in red, and intermediate grading was in green or yellow.

**Supplementary Figure S7. DW14006 treatment improved mitochondrial inner membrane potential (MMP) in high glucose (HG)-treated primary DRG neurons.**

(A) Relative level of MMP in primary DRG neurons measured by TMRM dye. Data were presented as mean  $\pm$  SD of n = 4. \*P < 0.05; \*\*P < 0.01; \*\*\*P < 0.001, HG vs. DMSO by Student's t-test. # P < 0.05; ## P < 0.01; ### P < 0.001, DW14006 or FCCP-treated HG groups vs. HG group by one-way ANOVA with Dunnett's post-hoc test. HG, 45 mM glucose; the uncoupling agent FCCP (2  $\mu$ M) induced partial depolarization.

**Supplementary Figure S8. DW14006 treatment downregulated Akt/mTOR signaling in diabetic mice.**

(A-B) Quantitative immunoblot analysis revealed that expressions of p-Akt (T308) and p-mTOR were increased in diabetic mice (STZ and *db/db*) and downregulated in DW14006-treated diabetic mice (STZ+15, 30 mg/kg and *db/db*+15, 30 mg/kg). (C) Quantitative analyses for (A). (D) Quantitative analyses for (B). T-ERK remained unchanged. Values were presented as mean  $\pm$  SD of n = 3. \*P < 0.05; \*\*P < 0.01; \*\*\*P < 0.001, STZ or *db/db* mice vs. Control or *db/m* mice by Student's t-test. # P < 0.05; ## P < 0.01; ### P < 0.001, DW14006-treated STZ or *db/db* mice vs. STZ or *db/db* mice by one-way ANOVA with Dunnett's post-hoc test.

**Supplementary Figure S9. DW14006 treatment had no effect on neurological function in nondiabetic mice.**

(A) Tactile allodynia, (B) radial heat plate test and (C) motor nerve conduction velocity (MNCV) were detected to evaluate neurological function in nondiabetic mice. All data were presented as mean  $\pm$  SEM (n = 8/group). Data were analyzed by two-way ANOVA with Tukey's test. There was no difference between groups with appropriate time-matched comparisons.
