# Supplementary material
Source: publisher figshare collection journal article supplement (https://diabetesjournals.figshare.com/articles/dataset/_/12583115)
Supplement: Supplementary file 3 [file 1]

## SUPPLEMENTAL DATA

**Supplementary Table 1. Antibodies used for immunohistochemistry.**

| Antibody name                      | Company and catalog number |
|------------------------------------|----------------------------|
| anti-NF- $\kappa$ B                | CST, 8242S                 |
| anti-Nrf2                          | Abcam, ab137550            |
| anti-8-OHdG                        | Bioss, bs-1278R            |
| anti- $\beta$ -tubulin isotype III | Sigma Aldrich, T8578       |

**Supplementary Table 2. Antibodies used for Western blotting.**

| Antibody name                | Company and catalog number             |
|------------------------------|----------------------------------------|
| anti-p-AMPK                  | Cell Signaling Technology (CST), 4185S |
| anti-AMPK                    | CST, 2532S                             |
| anti-SIRT1                   | Abcam, ab110304                        |
| anti-PGC-1 $\alpha$          | Abcam, ab54481                         |
| anti-p-ACC                   | CST, 11818S                            |
| anti-COX IV                  | Proteintech, 11242-1-AP                |
| anti-NDUFS3                  | Proteintech, 15066-1-AP                |
| anti-TNF- $\alpha$           | CST, 11948S                            |
| anti- iNOS                   | CST, 13120S                            |
| anti-ERK                     | CST, 4695S                             |
| anti- $\beta$ -actin         | Abcam, ab8226                          |
| anti-p-I $\kappa$ B $\alpha$ | CST, 9246S                             |
| anti-I $\kappa$ B $\alpha$   | CST, 4812S                             |
| anti-p-Akt                   | CST, 13038T                            |

|              |            |
|--------------|------------|
| anti-AKT     | CST, 9272S |
| anti-p-mTOR  | CST, 5536S |
| anti- mTOR   | CST, 2972S |
| anti-p-NF-κB | CST, 3033S |
| anti- NF-κB  | CST, 8242  |

**Supplementary Table 3. The pharmacokinetic parameters of DW15139 by IV delivery.**

| IV delivery<br>(10 mg/kg) |                      | Parameter | DW15139 | DW14006  |
|---------------------------|----------------------|-----------|---------|----------|
| Plasma                    | C <sub>max</sub>     | ng/mL     | /       | 17911.12 |
|                           | t <sub>max</sub>     | h         | /       | 0.05     |
|                           | t <sub>1/2</sub>     | h         | 0.36    | 2.01     |
|                           | AUC <sub>0-12h</sub> | h*ng/mL   | 1269.90 | 4203.04  |
| DRG                       | C <sub>max</sub>     | ng/g      | 831.30  | 525.38   |
|                           | t <sub>max</sub>     | h         | 0.05    | 0.18     |
|                           | t <sub>1/2</sub>     | h         | /       | 2.74     |
|                           | AUC <sub>0-12h</sub> | h*ng/g    | 295.80  | 641.06   |

/ indicates parameter cannot be calculated.

**Supplementary Table 4. The pharmacokinetic parameters of DW15139 by PO delivery.**

| PO delivery<br>(30 mg/kg) |                      | Parameter | DW15139 | DW14006 |
|---------------------------|----------------------|-----------|---------|---------|
| Plasma                    | AUC <sub>0-12h</sub> | h*ng/mL   | 1.63    | 49.41   |
| DRG                       | AUC <sub>0-12h</sub> | h*ng/g    | 295.80  | 588.04  |

/ indicates parameter cannot be calculated. As indicated in **Supplementary Table 3-4**, after DW15139 (IV or PO) administration, we monitored DW15139 and its hydrolysate

DW14006 in plasma or target tissue (DRG). Plasma and snap-frozen DRG were collected at 8 time points (n = 6/each point, half male and half female C57BL/6 mice) for analysis of DW15139 and DW14006 levels by LC/MS/MS assay. Data are the mean values.

**Supplementary Table 5. LD<sub>50</sub> calculation of DW14006 against C57BL/6 mice (*i.p*)**

| Groups | Number(n) | Dose(mg/kg) | Log of dose | death rate |
|--------|-----------|-------------|-------------|------------|
| 1      | 8         | 640         | 2.8062      | 1          |
| 2      | 8         | 512         | 2.7093      | 1          |
| 3      | 8         | 409.60      | 2.6124      | 1          |
| 4      | 8         | 327.68      | 2.5154      | 1          |
| 5      | 8         | 262.14      | 2.4185      | 0.5        |
| 6      | 8         | 209.72      | 2.3216      | 0          |

$LD_{50} = \lg^{-1} \{X_m - i(\sum p - 0.5)\}$  ( $X_m$ : the highest dose converted to logarithm;  $i$ : Difference of dose logarithm between adjacent groups;  $\sum p$ : sum of death rate)

$LD_{50} = \lg^{-1} \{2.8062 - 0.0969(4.5 - 0.5)\} = 262.1682 \text{ mg/kg.}$
